# Supplementary material for: Effect of Gram Stain–Guided Initial Antibiotic Therapy on Clinical Response in Patients With Ventilator-Associated Pneumonia: The GRACE-VAP Randomized Clinical Trial
Source: PubMed Central journal article supplement (PMC8994124; doi:10.1001/jamanetworkopen.2022.6136), 2022-04-08
Supplement: jamanetwopen-e226136-s002.pdf [file jamanetwopen-e226136-s002.pdf]

## Supplementary Online Content

Yoshimura J, Yamakawa K, Ohta Y, et al. Effect of Gram stain–guided initial antibiotic therapy on clinical response in patients with ventilator-associated pneumonia: the GRACE-VAP randomized clinical trial. *JAMA Netw Open*. 2022;5(4):e226136. doi:10.1001/jamanetworkopen.2022.6136

**eTable 1.** Participating Institutions and Investigators

**eTable 2.** Members of the Data and Safety Monitoring Board

**eTable 3.** Antibiogram of Participating Institutions

**eTable 4.** Microorganisms Isolated in Respiratory Samples

**eTable 5.** Summary of the Results of Gram Staining

**eTable 6.** Summary of Selected Antibiotic Agents

**eTable 7.** Clinical Response of Participating Institutions

**eTable 8.** Concordance Between Results of Gram Staining and Culture

**eFigure 1.** Interventions

**eFigure 2.** Twenty-Eight-Day Mortality in the Gram Stain–guided Group and Guideline-based Group

This supplementary material has been provided by the authors to give readers additional information about their work.

**eTable 1.** Participating Institutions and Investigators

| <b>Institution</b>                                | <b>Investigator</b>       |
|---------------------------------------------------|---------------------------|
| Chukyo Hospital                                   | Akinori Osuka, MD, PhD    |
| Ebina General Hospital                            | Takeshi Yamagiwa, MD, PhD |
| Hitachi General Hospital                          | Kensuke Nakamura, MD, PhD |
| Kansai Medical University Hospital                | Hiroki Takahashi, MD      |
| Kansai Medical University Medical Center          | Masahiro Kawada, MD       |
| Nagasaki University Hospital                      | Shuhei Yamano, MD         |
| Osaka General Medical Center                      | Jumpei Yoshimura, MD      |
| Saga University Hospital                          | Ryota Sakurai, MD         |
| Sapporo City General Hospital                     | Akira Kodate, MD          |
| Tajima Emergency and Critical Care Medical Center | Makoto Kobayashi, MD      |
| University of the Ryukyus Hospital                | Takayuki Taira, MD        |
| Wakayama Medical University Hospital              | Kyohei Miyamoto, MD, PhD  |

**eTable 2.** Members of the Data and Safety Monitoring Board

| <b>Member name</b>        | <b>Institution</b>                                                                            |
|---------------------------|-----------------------------------------------------------------------------------------------|
| Yuichiro Oba, MD, DTM&H   | Department of General Internal Medicine and Infectious Diseases, Osaka General Medical Center |
| Atsushi Hiraide, MD, PhD  | Department of Paramedic Science, Faculty of Health Sciences, Kyoto Tachibana University       |
| Hitoshi Yamamura, MD, PhD | Osaka Prefectural Nakakawachi Emergency and Critical Care Center                              |

**eTable 3.** Antibiogram of Participating Institutions

|                                          |          | Methicillin-sensitive<br><i>Staphylococcus aureus</i> | <i>Pseudomonas aeruginosa</i> |          |     |      |      |
|------------------------------------------|----------|-------------------------------------------------------|-------------------------------|----------|-----|------|------|
|                                          |          |                                                       | PIPC                          | PIPC/TAZ | CAZ | CFPM | MEPM |
| Chukyo Hospital                          | 2017 (%) | 54                                                    | 90                            | 91       | 93  | -    | 88   |
|                                          | 2018 (%) | 55                                                    | 94                            | 95       | 95  | -    | 94   |
|                                          | 2019 (%) | 60                                                    | 93                            | 96       | 95  | 94   | 92   |
| Ebina General Hospital                   | 2017 (%) | 66                                                    | 85                            | 85       | 89  | 94   | 90   |
|                                          | 2018 (%) | 68                                                    | 87                            | 87       | 90  | 93   | 92   |
|                                          | 2019 (%) | 57                                                    | 82                            | 82       | 88  | 89   | 93   |
| Hitachi General Hospital                 | 2017 (%) | 59                                                    | 90                            | 90       | 90  | 88   | 94   |
|                                          | 2018 (%) | 67                                                    | 81                            | 85       | 85  | 85   | 89   |
|                                          | 2019 (%) | 65                                                    | 88                            | 92       | 91  | 90   | 91   |
| Kansai Medical University Hospital       | 2017 (%) | 45                                                    | 91                            | 93       | 94  | 89   | 92   |
|                                          | 2018 (%) | 44                                                    | 97                            | 95       | 96  | 96   | 95   |
|                                          | 2019 (%) | 60                                                    | 92                            | 92       | 92  | 91   | 92   |
| Kansai Medical University Medical Center | 2017 (%) | 51                                                    | 80                            | 85       | 91  | 92   | 84   |
|                                          | 2018 (%) | 51                                                    | 86                            | 85       | 94  | 96   | 87   |
|                                          | 2019 (%) | 45                                                    | 74                            | 66       | 85  | 92   | 74   |
| Nagasaki University Hospital             | 2017 (%) | 63                                                    | 84                            | 86       | 85  | 90   | 88   |

|                                                   |          |    |    |    |    |    |     |
|---------------------------------------------------|----------|----|----|----|----|----|-----|
|                                                   | 2018 (%) | 63 | 93 | 92 | 91 | 91 | 89  |
|                                                   | 2019 (%) | 68 | 96 | 93 | 94 | 93 | 92  |
| Osaka General Medical Center                      | 2017 (%) | 57 | 72 | 74 | 77 | 82 | 80  |
|                                                   | 2018 (%) | 68 | 77 | 77 | 79 | 83 | 85  |
|                                                   | 2019 (%) | 60 | 90 | 93 | 92 | 94 | 95  |
| Saga University Hospital                          | 2017 (%) | 58 | 96 | 97 | 95 | 96 | 99  |
|                                                   | 2018 (%) | 58 | 96 | 96 | 94 | 95 | 100 |
|                                                   | 2019 (%) | 56 | 93 | 95 | 91 | 94 | 97  |
| Sapporo City General Hospital                     | 2017 (%) | -  | -  | -  | -  | -  | -   |
|                                                   | 2018 (%) | 77 | 87 | 88 | 95 | 96 | 88  |
|                                                   | 2019 (%) | 81 | 95 | 95 | 97 | 94 | 95  |
| Tajima Emergency and Critical Care Medical Center | 2017 (%) | 58 | 97 | 99 | 98 | 97 | 95  |
|                                                   | 2018 (%) | 69 | 94 | 94 | 94 | 93 | 94  |
|                                                   | 2019 (%) | 61 | 97 | 97 | 96 | 97 | 96  |
| University of the Ryukyus Hospital                | 2017 (%) | 45 | 68 | 69 | 84 | 83 | 76  |
|                                                   | 2018 (%) | 53 | 84 | 86 | 90 | 93 | 88  |
|                                                   | 2019 (%) | 55 | 81 | 85 | 87 | 90 | 89  |
| Wakayama Medical University Hospital              | 2017 (%) | 70 | 91 | 93 | 93 | 91 | 92  |
|                                                   | 2018 (%) | 73 | 91 | 93 | 92 | 91 | 88  |
|                                                   | 2019 (%) | 73 | 90 | 92 | 91 | 91 | 92  |

Abbreviations: CAZ, ceftazidime; CFPM, cefepime; MEPM, meropenem; PIPC, piperacillin; PIPC/TAZ, piperacillin/tazobactam.

**eTable 4.** Microorganisms Isolated in Respiratory Samples

|                                   | <b>Gram stain-guided group<br/>(n=103)</b> | <b>Guideline-based group<br/>(n=103)</b> |
|-----------------------------------|--------------------------------------------|------------------------------------------|
| Gram-positive bacteria            |                                            |                                          |
| <i>Staphylococcus aureus</i>      | 50                                         | 53                                       |
| MRSA                              | 9                                          | 13                                       |
| <i>Streptococcus pneumonia</i>    | 1                                          | 6                                        |
| <i>Corynebacterium</i> spp.       | 3                                          | 1                                        |
| Other streptococci                | 54                                         | 53                                       |
| Other Gram-positive bacilli       | 1                                          | 1                                        |
| Gram-negative bacteria            |                                            |                                          |
| <i>Klebsiella</i> spp.            | 18                                         | 16                                       |
| <i>Haemophilus influenza</i>      | 9                                          | 11                                       |
| <i>Enterobacter</i> spp.          | 10                                         | 8                                        |
| <i>Escherichia coli</i>           | 7                                          | 9                                        |
| <i>Pseudomonas aeruginosa</i>     | 2                                          | 9                                        |
| <i>Serratia marcescens</i>        | 6                                          | 2                                        |
| <i>Moraxella catarrhalis</i>      | 6                                          | 1                                        |
| <i>Acinetobacter baumannii</i>    | 5                                          | 1                                        |
| <i>Citrobacter</i> spp.           | 1                                          | 2                                        |
| ESBL-producing Enterobacteriaceae | 4                                          | 2                                        |
| Other Gram-negative bacteria      | 5                                          | 7                                        |
| MDR Gram-negative bacteria        | 0                                          | 0                                        |

Abbreviations: ESBL, extended-spectrum beta-lactamase; MDR, multi-drug resistant; MRSA, methicillin-resistant *Staphylococcus aureus*.

**eTable 5.** Summary of the Results of Gram Staining

|                               | <b>Gram stain-guided group<br/>(n=103)</b> | <b>Guideline-based group<br/>(n=103)</b> |
|-------------------------------|--------------------------------------------|------------------------------------------|
| Gram-positive cocci chains    | 52                                         | 50                                       |
| Gram-positive cocci clusters  | 56                                         | 55                                       |
| Gram-positive bacilli         | 28                                         | 28                                       |
| Gram-negative rods            | 65                                         | 57                                       |
| Absence of any microorganisms | 5                                          | 9                                        |

**eTable 6.** Summary of Selected Antibiotic Agents

|                                                     | <b>Gram stain-guided group<br/>(n=103)</b> | <b>Guideline-based group<br/>(n=103)</b> |
|-----------------------------------------------------|--------------------------------------------|------------------------------------------|
| Anti-MRSA agent and anti-pseudomonal agent          | 43                                         | 103                                      |
| Anti-MRSA agent and non-pseudomonal $\beta$ -lactam | 1                                          | 0                                        |
| Anti-MRSA agent                                     | 19                                         | 0                                        |
| Anti-pseudomonal agent                              | 29                                         | 0                                        |
| Non-pseudomonal $\beta$ -lactam                     | 11                                         | 0                                        |

Abbreviation: MRSA, methicillin-resistant *Staphylococcus aureus*.



**eTable 7.** Clinical Response of Participating Institutions

| Participating Institutions, n (%)                 | Clinical Response       |                       | Risk difference (95% CI) |
|---------------------------------------------------|-------------------------|-----------------------|--------------------------|
|                                                   | Gram stain-guided group | Guideline-based group |                          |
| Osaka General Medical Center                      | 36/40 (80.0)            | 38/41 (92.7)          | -0.027 (-0.15-0.10)      |
| Hitachi General Medical Hospital                  | 24/37 (64.9)            | 20/37 (54.1)          | 0.11 (-0.11-0.33)        |
| Kansai Medical University Medical Center          | 5/9 (55.6)              | 5/8 (62.5)            | -0.069 (-0.54-0.40)      |
| Kansai Medical University Hospital                | 5/5 (100)               | 1/4 (25.0)            | 0.75 (0.33-1.17)         |
| Ebina General Hospital                            | 2/2 (100)               | 4/5 (80.0)            | 0.20 (-0.15-0.55)        |
| Sapporo City General Hospital                     | 1/2 (50.0)              | 4/4 (100)             | -0.5 (-1.19-0.19)        |
| Wakayama Medical University Hospital              | 3/4 (75.0)              | 1/1 (100)             | -0.25 (-0.67-0.17)       |
| Chukyo Hospital                                   | 2/2 (100)               | 1/1 (100)             | -                        |
| Nagasaki University Hospital                      | 0/1 (0)                 | 0/0                   | -                        |
| University of the Ryukyus Hospital                | 0/0                     | 0/1 (0)               | -                        |
| Saga University Hospital                          | 1/1 (100)               | 0/0                   | -                        |
| Tajima Emergency and Critical Care Medical Center | 0/0                     | 0/1 (0)               | -                        |

**eTable 8.** Concordance Between Results of Gram Staining and Culture

| <b>GPC cluster</b>           |       |                                                             |     |       |
|------------------------------|-------|-------------------------------------------------------------|-----|-------|
|                              |       | <i>Staphylococcus aureus</i> growth in culture <sup>a</sup> |     |       |
|                              |       | Yes                                                         | No  | Total |
| GPC cluster in Gram staining | Yes   | 86                                                          | 25  | 111   |
|                              | No    | 17                                                          | 78  | 95    |
|                              | Total | 103                                                         | 103 | 206   |
| <b>GPC chain</b>             |       |                                                             |     |       |
|                              |       | Gram-positive Streptococcus species in culture <sup>b</sup> |     |       |
|                              |       | Yes                                                         | No  | Total |
| GPC chain in Gram staining   | Yes   | 79                                                          | 23  | 102   |
|                              | No    | 35                                                          | 69  | 104   |
|                              | Total | 114                                                         | 92  | 206   |
| <b>GPB</b>                   |       |                                                             |     |       |
|                              |       | Gram-positive bacilli in culture <sup>c</sup>               |     |       |
|                              |       | Yes                                                         | No  | Total |
| GPB in Gram staining         | Yes   | 4                                                           | 52  | 56    |
|                              | No    | 1                                                           | 149 | 150   |
|                              | Total | 5                                                           | 201 | 206   |
| <b>GNR</b>                   |       |                                                             |     |       |
|                              |       | Gram-negative pathogen growth in culture <sup>d</sup>       |     |       |
|                              |       | Yes                                                         | No  | Total |
| GNR in Gram staining         | Yes   | 78                                                          | 44  | 122   |
|                              | No    | 16                                                          | 68  | 84    |
|                              | Total | 94                                                          | 112 | 206   |

Abbreviations: GPB, Gram-positive bacilli; GPC, Gram-positive cocci; GNR, Gram-negative rods.

<sup>a</sup> Sensitivity of GPC cluster in Gram staining: 86/103=83.5%; specificity of GPC cluster in Gram staining: 78/103=75.7%.

<sup>b</sup> Sensitivity of GPC chain in Gram staining: 79/114=69.3%; specificity of GPC chain in Gram staining: 69/92=67.4%.

<sup>c</sup> Sensitivity of GPB in Gram staining: 4/5=80.0%; specificity of GPB in Gram staining: 149/201=74.1%.

<sup>d</sup> Sensitivity of GNR in Gram staining: 78/94=83.0%; specificity of GNR in Gram staining: 68/112=60.7%.

**eFigure 1. Interventions**

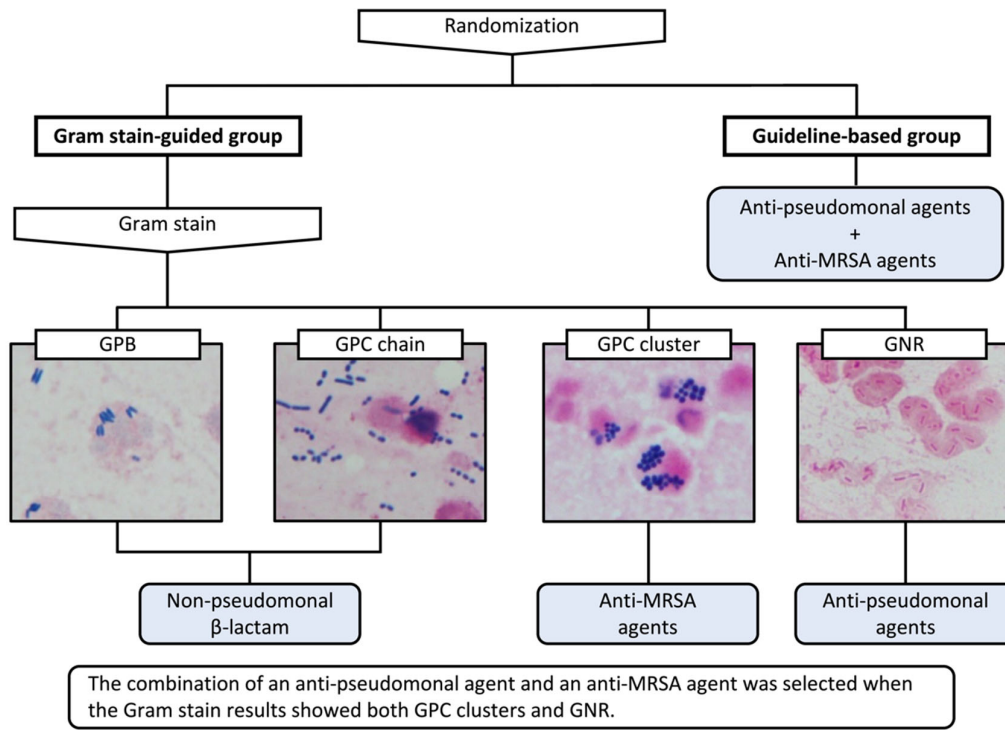

Abbreviations: GPB, Gram-positive bacilli; GPC, Gram-positive cocci; GNR, Gram-negative rods; MRSA, methicillin-resistant *Staphylococcus aureus*.

**eFigure 2.** Twenty-Eight-Day Mortality in the Gram Stain–guided Group and Guideline-based Group

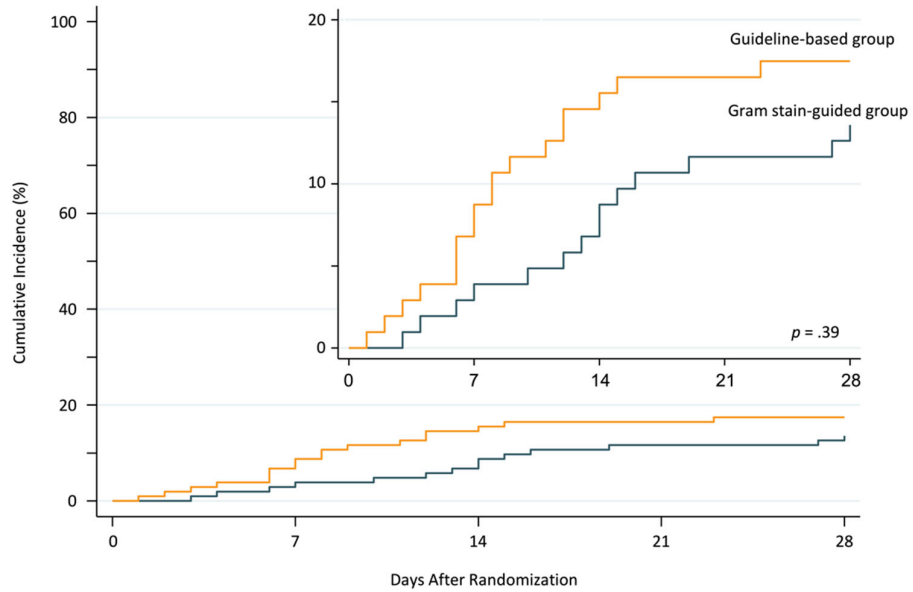

**Guideline-based group**

|                             |     |      |       |       |       |
|-----------------------------|-----|------|-------|-------|-------|
| Number at risk              | 103 | 94   | 87    | 86    | 85    |
| Cumulative number of events |     | 9    | 16    | 17    | 18    |
| Cumulative incidence        |     | 8.7% | 15.5% | 16.5% | 17.5% |

**Gram stain-guided group**

|                             |     |      |      |       |       |
|-----------------------------|-----|------|------|-------|-------|
| Number at risk              | 103 | 99   | 94   | 91    | 89    |
| Cumulative number of events |     | 4    | 9    | 12    | 14    |
| Cumulative incidence        |     | 3.9% | 8.7% | 11.7% | 13.6% |

The inset shows the same data on an expanded y axis.
