# Supplementary material for: Effect of Gram Stain–Guided Initial Antibiotic Therapy on Clinical Response in Patients With Ventilator-Associated Pneumonia: The GRACE-VAP Randomized Clinical Trial
Source: PubMed Central journal article supplement (PMC8994124; doi:10.1001/jamanetworkopen.2022.6136), 2022-04-08
Supplement: jamanetwopen-e226136-s003.pdf [file jamanetwopen-e226136-s003.pdf]

## Data Sharing Statement

Yoshimura. Effect of Gram Stain-Guided Initial Antibiotic Therapy on Clinical Response in Patients With Ventilator-Associated Pneumonia. *JAMA Netw Open*. Published April 08, 2022. doi:10.1001/jamanetworkopen.2022.6136

### Data

**Data available:** Yes

**Data types:** Deidentified participant data

**How to access data:** How to access data: Corresponding author email: kyamakawa-[osk@umin.ac.jp](mailto:osk@umin.ac.jp)

**When available:** beginning date: 04-01-2024

### Supporting Documents

**Document types:** None

### Additional Information

**Who can access the data:** Researchers whose proposed use of the data has been approved

**Types of analyses:** For a specified purpose

**Mechanisms of data availability:** After approval of a proposal
